# Supplementary material
Source: ML conference proceedings conference paper supplement (https://proceedings.neurips.cc/paper_files/paper/2021/hash/af87f7cdcda223c41c3f3ef05a3aaeea-Abstract.html)
Supplement: Supplementary file 1 [file af87f7cdcda223c41c3f3ef05a3aaeea-Supplemental.zip]

Archive with 2 entries (2 files):
- boids_animation.mp4
- supplementary_material.pdf
